# Supplementary material for: The dynamic changes in the number of uterine natural killer cells are specific to the eutopic but not to the ectopic endometrium in women and in a baboon model of endometriosis
Source: Springer Nature journal article supplement (doi:10.1186/s12958-018-0385-3), 2018-07-18

**A**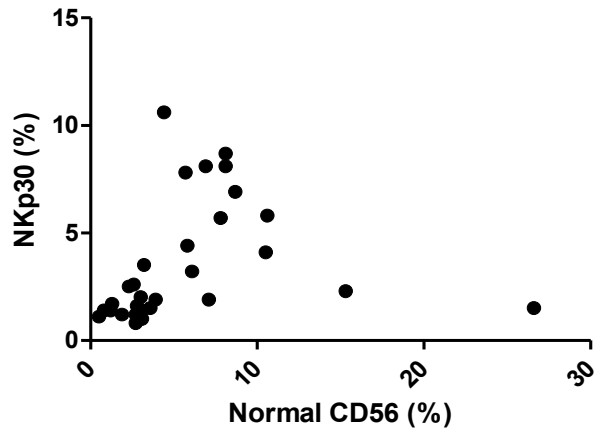**B**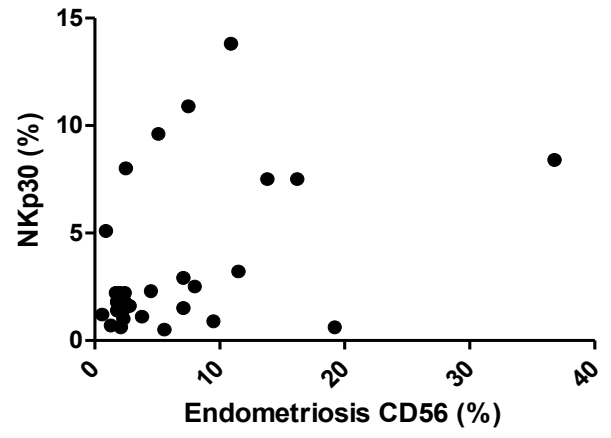

Supplement: MOESM1 [file 15961954]
